# Supplementary material
Source: publisher site journal article supplement (https://study.sagepub.com/sites/default/files/phillips_kelly_2e_appendix_1b.doc)
Supplement: Supplementary file 1 [file phillips_kelly_2e_appendix_1b.doc]

**Appendix 1(b)** Example of Teacher-made Test of Phonic Skills (Real Words)

**PHONIC SKILLS READING TEST (REAL WORDS)**

The words can be copied on to small cards or written in columns. The learner is asked to read them aloud and their response recorded.

| van | hum |  |  | sit |
| --- | --- | --- | --- | --- |
| top | led | rat | wet | but |
|  |  |  |  |  |
| milk | hand | sink | belt | bunk |
| wisp | loft | list | damp | rent |
|  |  |  |  |  |
| crab | plum | skip | smug | snap |
| spin | drop | trap | grin | step |
|  |  |  |  |  |
| chip | rich | ditch | shed | pack |
| with | thin | fish | whip | phone |
|  |  |  |  |  |
| pain | may | weigh | late | claw |
| torn | bore | roar | shout | clown |
|  |  |  |  |  |
| moan | bone | blown | chose | collar |
| colour | dream | field | meet | beat |
|  |  |  |  |  |
| wipe | light | try | pie | tube |
| root | stew | rule | hard | burst |
| shirt | dirty | curl | herd | though |

**Notes:** These are suggested words; teachers may devise their own test, adopting the principles previously described.

The same words can be used to assess spelling, although the spelling test should not be given on the same day. A comparison of results will provide valuable information.

If a learner has many errors in the first two sets, discontinue. However, if they are successful in these and they then struggle, it is worth asking them to look carefully at other lines and words to see if they can read any of the others.

(Correct responses may reflect their phonic skills but **could** imply they have read them as ‘sight’ vocabulary.)

**Photocopiable**

*Assessment of Learners with Dyslexic-Type Difficulties* 2e © 2018 Sylvia Phillips and Kathleen Kelly (Sage: London).
